# Supplementary material for: Unraveling the Coupled Dynamics between DOM Transformation and Arsenic Mobilization in Aquifer Systems during Microbial Sulfate Reduction: Evidence from Sediment Incubation Experiment
Source: MDPI journal article supplement (doi:10.3390/w16091266), 2024-04-28
Supplement: s1 [file s1]

Archive with 1 entries (1 files):
- water-2920645-supplementary.pdf
